# Supplementary material for: Exogenous Vitamins K Exert Anti-Inflammatory Effects Dissociated from Their Role as Substrates for Synthesis of Endogenous MK-4 in Murine Macrophages Cell Line
Source: MDPI journal article supplement (doi:10.3390/cells10071571), 2021-06-22
Supplement: s1 [file s1]

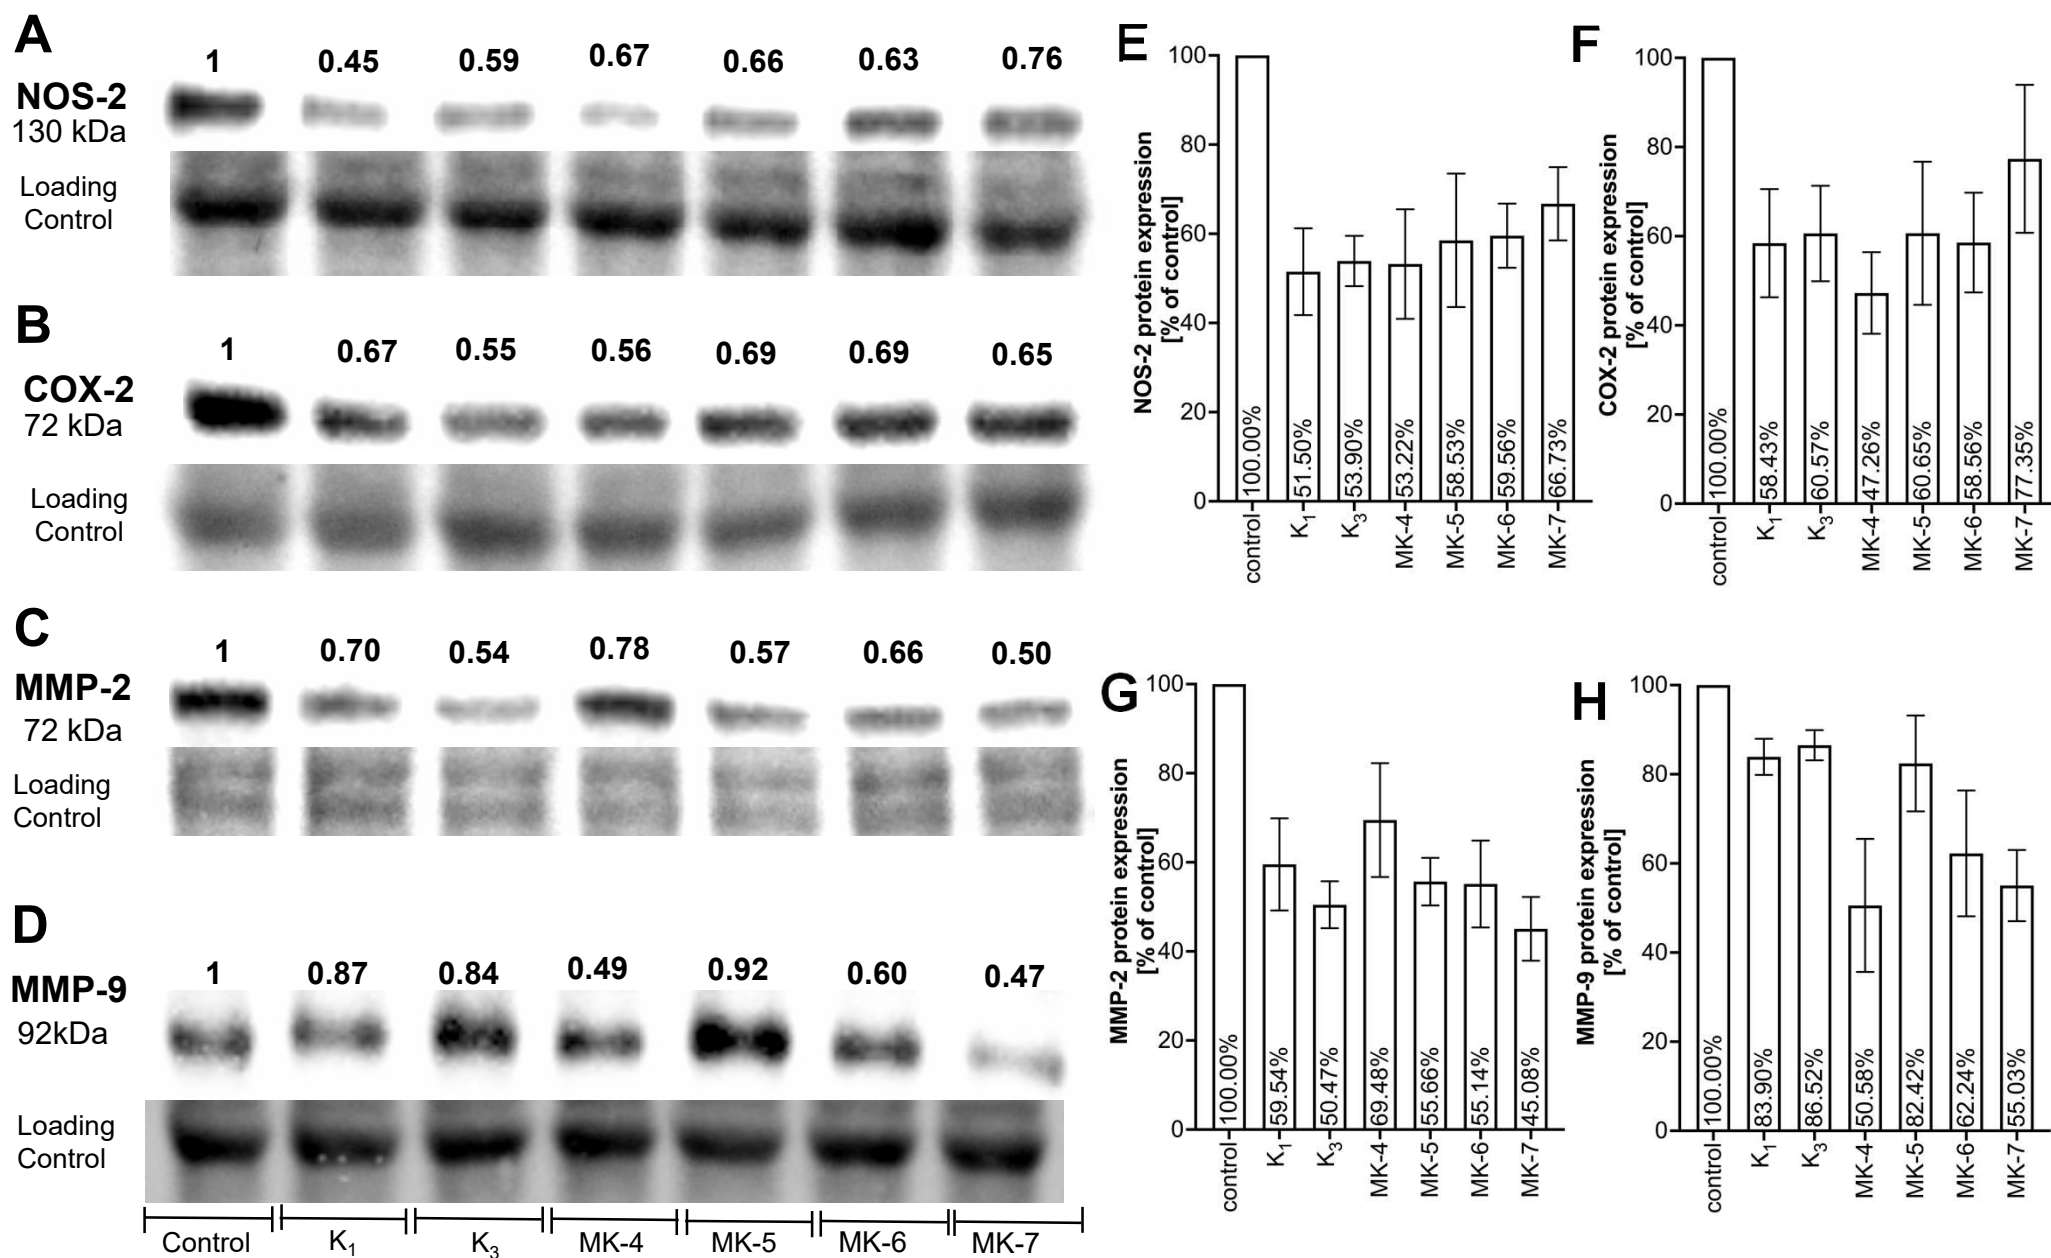

**Figure. S1 Inhibition of NOS-2 , COX-2, MMP-2 and MMP-9 expression by various forms of vitamin K in RAW 264.7 cells stimulated with LPS.** Western blot images from representative experiments present effect of vitamin K analogues on NOS-2 (A), COX-2 (B), MMP-2 (C) and MMP-9 (D) expression after 48 h incubation with various forms of 10  $\mu$ M vitamin K in presence of 1ng/ml LPS as a fold change vs control sample (without vitamin K). Total protein after transfer was used as loading control using stain free technique (BioRad). Charts are shown as means of NOS-2 (E), COX-2 (F), MMP-2 (G) and MMP-9 (H) expression  $\pm$  SD of three independent experiments. Percentage value are shown protein expression in response to vitamins K treatment (10  $\mu$ M) as a fold change  $\pm$  SD vs control sample (without vitamin K).

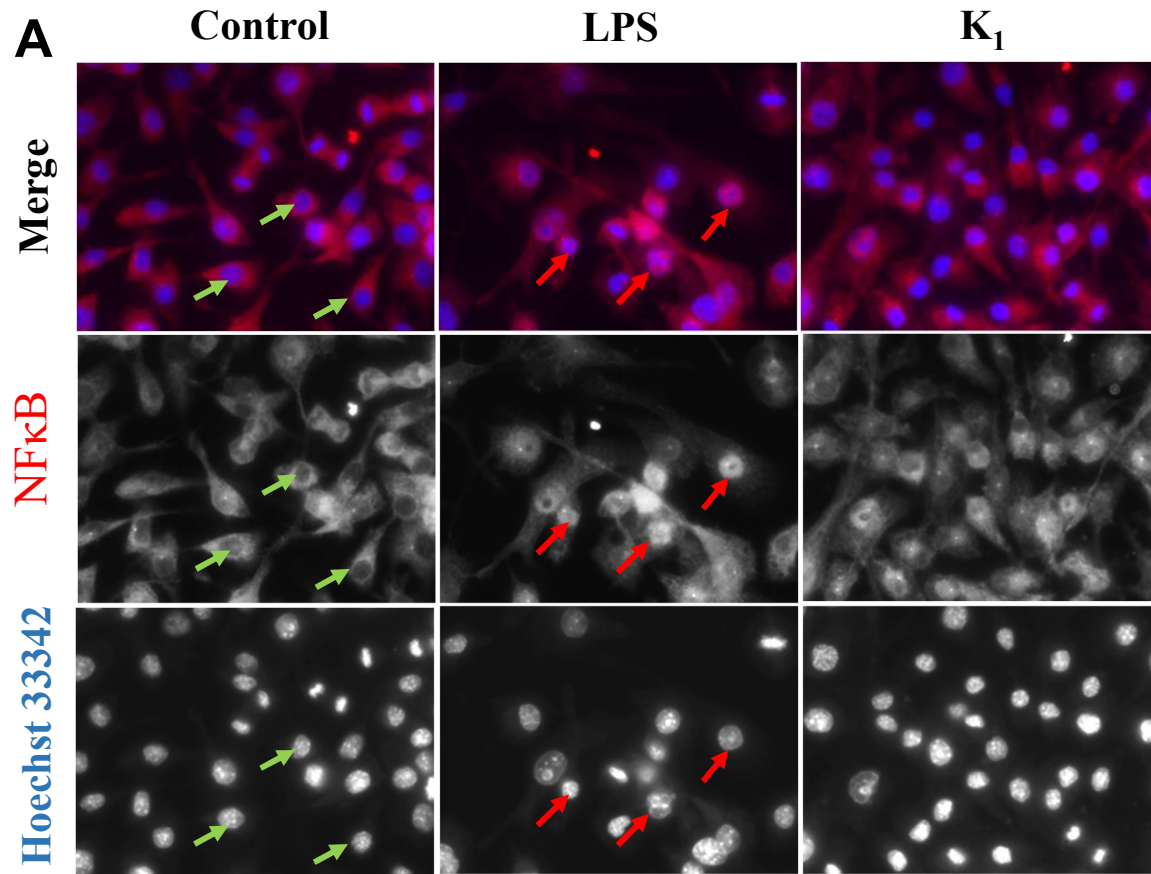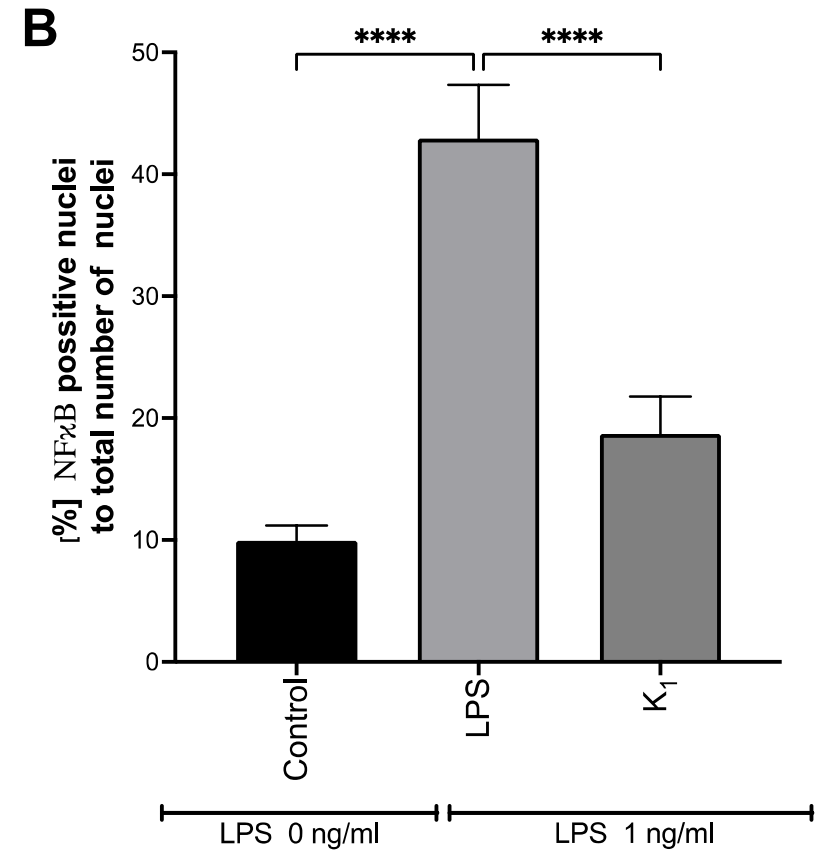

**Figure. S2 Role of NFκB in the anti-inflammatory action of Vitamin K.** The importance of nuclear translocation NFκB (A,B) was assessed in RAW 264.7 murine macrophages stimulated with LPS. The changes of nuclear translocation of NFκB in response to vitamin K treatment (K<sub>1</sub>) was demonstrated on representative pictures (A). The examples of NFκB immuno-negative and immuno-positive nuclei were marked with a green or red arrow respectively. Moreover the percentage of NFκB positive nuclei to all nuclei for each picture was shown in the graph as mean ± SEM of three independent experiments and three technical replicates and three pictures from each well, (n=9) (see more in **Materials and Methods** 2.6.) Statistical significance was evaluated by Two-way ANOVA followed by Dunnett's post-hoc multiple comparisons using GraphPad Prism 9 software. The symbol \*\*\*\* indicate statistical significance at p < 0.0001.
